# Supplementary material for: Recombinant Erythropoietin Provides Protection against Renal Fibrosis in Adenine-Induced Chronic Kidney Disease
Source: Hindawi journal article supplement (doi:10.1155/2020/8937657), 2020-02-27

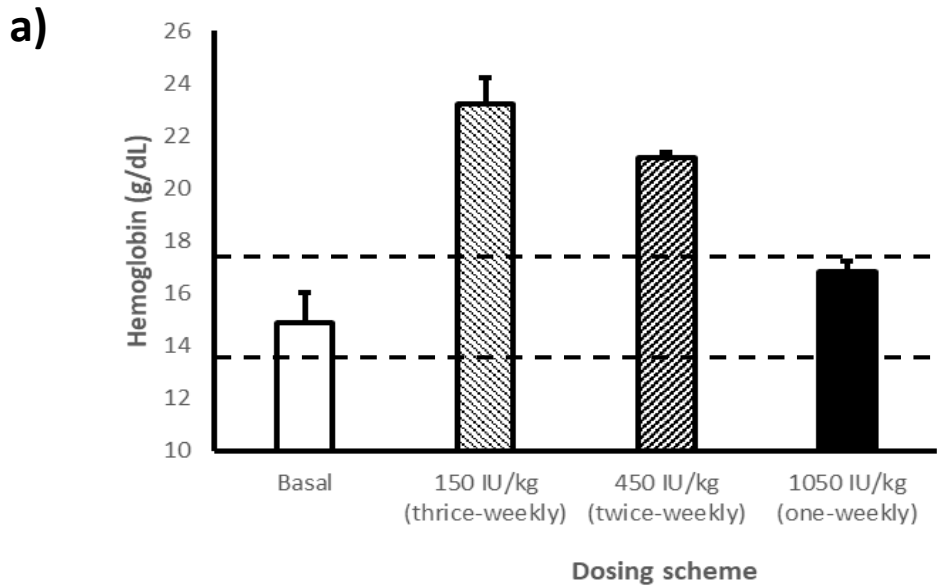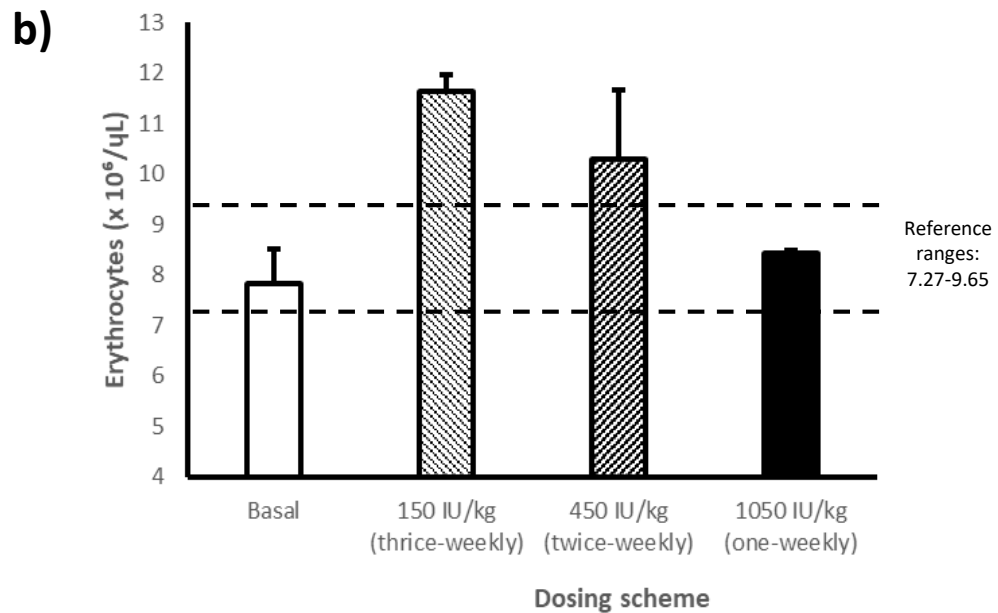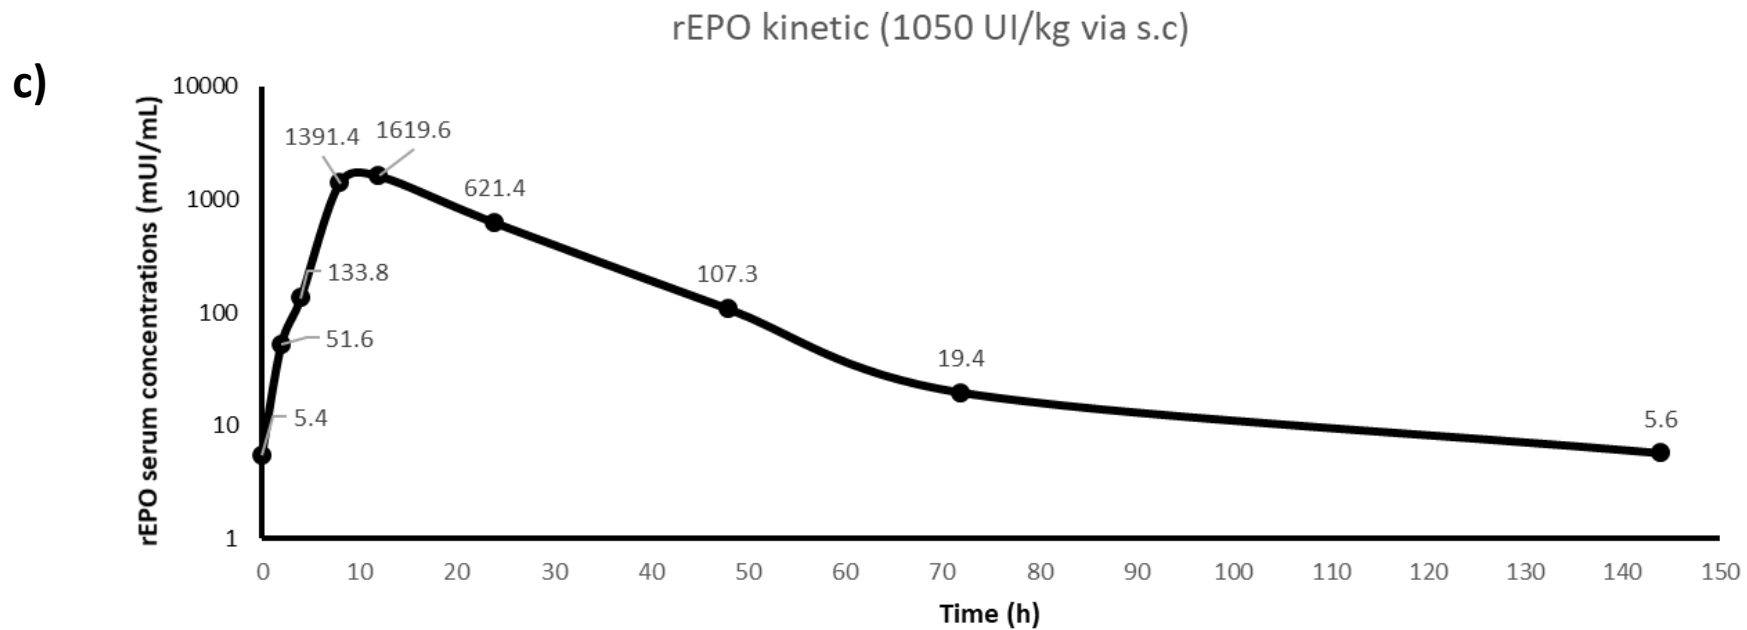

Supplement: f1 [file 8937657.f1.pdf]
